# Supplementary material for: Phylogenomics and barcoding of Panax: toward the identification of ginseng species
Source: PubMed Central journal article supplement (PMC5883351; doi:10.1186/s12862-018-1160-y), 2018-04-03
Supplement: 12862_2018_1160_MOESM2_ESM.pdf [file 12862_2018_1160_MOESM2_ESM.pdf]

| NCBI Reference Sequence | Genus                  | Species               | Cultivar  | Reference article |
|-------------------------|------------------------|-----------------------|-----------|-------------------|
| KT153023                | <i>Aralia</i>          | <i>elata</i>          |           | [1]               |
| NC_022810               | <i>Aralia</i>          | <i>undulata</i>       |           | [2]               |
| KC456163                | <i>Aralia</i>          | <i>undulata</i>       |           | [3, 4]            |
| NC_022811               | <i>Brassaiopsis</i>    | <i>hainla</i>         |           | [4]               |
| KC456164                | <i>Brassaiopsis</i>    | <i>hainla</i>         |           | [3, 4]            |
| KP271241                | <i>Dendropanax</i>     | <i>dentiger</i>       |           | [3, 5]            |
| NC_026546               | <i>Dendropanax</i>     | <i>dentiger</i>       |           | [6]               |
| KR136270                | <i>Dendropanax</i>     | <i>morbifer</i>       |           | [1]               |
| NC_027607               | <i>Dendropanax</i>     | <i>morbifer</i>       |           | [7]               |
| KT153020                | <i>Eleutherococcus</i> | <i>gracilistylus</i>  |           | NA                |
| JN637765                | <i>Eleutherococcus</i> | <i>senticosus</i>     |           | [3, 4]            |
| NC_016430               | <i>Eleutherococcus</i> | <i>senticosus</i>     |           | [1, 8]            |
| NC_027685               | <i>Fatsia</i>          | <i>japonica</i>       |           | [9]               |
| KR021045                | <i>Fatsia</i>          | <i>japonica</i>       |           | [9]               |
| HM596070                | <i>Hydrocotyle</i>     | <i>verticillata</i>   |           | [3, 5]            |
| KC456167                | <i>Kalopanax</i>       | <i>septemlobus</i>    |           | [3-5]             |
| NC_022814               | <i>Kalopanax</i>       | <i>septemlobus</i>    |           | [4]               |
| NC_022812               | <i>Metapanax</i>       | <i>delavayi</i>       |           | [4]               |
| KC456165                | <i>Metapanax</i>       | <i>delavayi</i>       |           | [3, 4]            |
| MF377620                | <i>Panax</i>           | <i>bipinnatifidus</i> |           | This article.     |
| KM067386                | <i>Panax</i>           | <i>ginseng</i>        | Cheongsun | [10]              |
| KM088019                | <i>Panax</i>           | <i>ginseng</i>        | Chunpoong | [1, 10]           |
| KC686331                | <i>Panax</i>           | <i>ginseng</i>        | damaya    | [10, 11]          |
| KC686332                | <i>Panax</i>           | <i>ginseng</i>        | Ermaya    | [3, 10, 11]       |
| KC686333                | <i>Panax</i>           | <i>ginseng</i>        | gaolishen | [10, 11]          |
| KM067387                | <i>Panax</i>           | <i>ginseng</i>        | Gopoong   | [10]              |
| KM067388                | <i>Panax</i>           | <i>ginseng</i>        | Gumpoong  | [10]              |
| KM067394                | <i>Panax</i>           | <i>ginseng</i>        | Hwangsook | [10]              |
| KM067389                | <i>Panax</i>           | <i>ginseng</i>        | Jakyung   | [10]              |
| KM067393                | <i>Panax</i>           | <i>ginseng</i>        | Sunhyang  | [10]              |
| KM067390                | <i>Panax</i>           | <i>ginseng</i>        | Sunone    | [10]              |
| KM067391                | <i>Panax</i>           | <i>ginseng</i>        | Sunpoong  | [10]              |
| KM067392                | <i>Panax</i>           | <i>ginseng</i>        | Sunun     | [10]              |
| KM088020                | <i>Panax</i>           | <i>ginseng</i>        | Yunpoong  | [10]              |
| AY582139                | <i>Panax</i>           | <i>ginseng</i>        |           | [4, 5]            |
| NC_006290               | <i>Panax</i>           | <i>ginseng</i>        |           | [10, 11]          |
| KF431956 [3]            | <i>Panax</i>           | <i>ginseng</i>        |           | [3, 11]           |
| KP036469                | <i>Panax</i>           | <i>japonicus</i>      |           | [1]               |
| NC_028703               | <i>Panax</i>           | <i>japonicus</i>      |           | [1]               |
| KJ566590                | <i>Panax</i>           | <i>notoginseng</i>    |           | [3, 12]           |

|           |                   |                      |               |
|-----------|-------------------|----------------------|---------------|
| NC_026447 | <i>Panax</i>      | <i>notoginseng</i>   | [12]          |
| KP036468  | <i>Panax</i>      | <i>notoginseng</i>   | [1]           |
| KR021381  | <i>Panax</i>      | <i>notoginseng</i>   | NA            |
| KT001509  | <i>Panax</i>      | <i>notoginseng</i>   | NA            |
| KT028714  | <i>Panax</i>      | <i>quinquefolius</i> | NA            |
| KM088018  | <i>Panax</i>      | <i>quinquefolius</i> | [1, 10]       |
| NC_027456 | <i>Panax</i>      | <i>quinquefolius</i> | [10]          |
| NC_030598 | <i>Panax</i>      | <i>stipuleanatus</i> | NA            |
| KX247147  | <i>Panax</i>      | <i>stipuleanatus</i> | NA            |
| MF377622  | <i>Panax</i>      | <i>stipuleanatus</i> | This article. |
| MF377621  | <i>Panax</i>      | <i>vietnamensis</i>  | This article. |
| MF377623  | <i>Panax</i>      | <i>vietnamensis</i>  | This article. |
| KU059178  | <i>Panax</i>      | <i>vietnamensis</i>  | [13]          |
| KP036470  | <i>Panax</i>      | <i>vietnamensis</i>  | [1]           |
| KP036471  | <i>Panax</i>      | <i>vietnamensis</i>  | [1]           |
| NC_028704 | <i>Panax</i>      | <i>vietnamensis</i>  | [1]           |
| KC456166  | <i>Schefflera</i> | <i>delavayi</i>      | [3, 4]        |
| NC_022813 | <i>Schefflera</i> | <i>delavayi</i>      | [4]           |
| NC_029764 | <i>Schefflera</i> | <i>heptaphylla</i>   | [14]          |
| KT748629  | <i>Schefflera</i> | <i>heptaphylla</i>   | [14]          |

1. Kim K, Nguyen VB, Dong J, Wang Y, Park JY, Lee S-C, Yang T-J: **Evolution of the Araliaceae family inferred from complete chloroplast genomes and 45S nrDNAs of 10 Panax-related species.** *Sci Rep* 2017, 7:4917.
2. Bock DG, Kane NC, Ebert DP, Rieseberg LH: **Genome skimming reveals the origin of the Jerusalem Artichoke tuber crop species: neither from Jerusalem nor an artichoke.** *New Phytologist* 2014, **201**(3):1021-1030.
3. Shi F-X, Li M-R, Li Y-L, Jiang P, Zhang C, Pan Y-Z, Liu B, Xiao H-X, Li L-F: **The impacts of polyploidy, geographic and ecological isolations on the diversification of Panax (Araliaceae).** *BMC Plant Biology* 2015, **15**(1):297.
4. Li R, Ma P-F, Wen J, Yi T-S: **Complete Sequencing of Five Araliaceae Chloroplast Genomes and the Phylogenetic Implications.** *PLOS ONE* 2013, **8**(10):e78568.
5. Yao X, Liu Y-Y, Tan Y-H, Song Y, Corlett RT: **The complete chloroplast genome sequence of Helwingia himalaica (Helwingiaceae, Aquifoliales) and a chloroplast phylogenomic analysis of the Campanulidae.** *PeerJ* 2016, **4**:e2734.
6. Wang L, Du X-J, Li X-F: **The complete chloroplast genome sequence of the evergreen plant Dendropanax dentiger (Araliaceae).** *Mitochondrial DNA Part A* 2016, **27**(6):4193-4194.
7. Kim K, Lee S-C, Yang T-J: **The complete chloroplast genome sequence of Dendropanax morbifera (Léveillé).** *Mitochondrial DNA Part A* 2016, **27**(4):2923-2924.
8. Yang J-B, Yang S-X, Li H-T, Yang J, Li D-Z: **Comparative chloroplast genomes of Camellia species.** *PLoS One* 2013, **8**(8):e73053.

9. Chen Q, Feng X, Li M, Yang B, Gao C, Zhang L, Tian J: **The complete chloroplast genome sequence of *Fatsia japonica* (Apiales: Araliaceae) and the phylogenetic analysis.** *Mitochondrial DNA Part A* 2016, **27**(4):3050-3051.
10. Kim K, Lee S-C, Lee J, Lee HO, Joh HJ, Kim N-H, Park H-S, Yang T-J: **Comprehensive Survey of Genetic Diversity in Chloroplast Genomes and 45S nrDNAs within *Panax ginseng* Species.** *PLOS ONE* 2015, **10**(6):e0117159.
11. Zhao Y, Yin J, Guo H, Zhang Y, Xiao W, Sun C, Wu J, Qu X, Yu J, Wang X *et al*: **The complete chloroplast genome provides insight into the evolution and polymorphism of *Panax ginseng*.** *Frontiers in Plant Science* 2015, **5**.
12. Dong W, Liu H, Xu C, Zuo Y, Chen Z, Zhou S: **A chloroplast genomic strategy for designing taxon specific DNA mini-barcodes: a case study on ginsengs.** *BMC genetics* 2014, **15**(1):138.
13. Nguyen B, Kim K, Kim Y-C, Lee S-C, Shin JE, Lee J, Kim N-H, Jang W, Choi H-I, Yang T-J: **The complete chloroplast genome sequence of *Panax vietnamensis* Ha et Grushv (Araliaceae).** *Mitochondrial DNA Part A* 2017, **28**(1):85-86.
14. Zong X, Song J, Lv J, Wang S: **The complete chloroplast genome sequence of *Schefflera octophylla*.** *Mitochondrial DNA Part A* 2016, **27**(6):4685-4686.
