# Supplementary material for: Phylogenomics and barcoding of Panax: toward the identification of ginseng species
Source: PubMed Central journal article supplement (PMC5883351; doi:10.1186/s12862-018-1160-y), 2018-04-03
Supplement: 12862_2018_1160_MOESM8_ESM.pdf [file 12862_2018_1160_MOESM8_ESM.pdf]

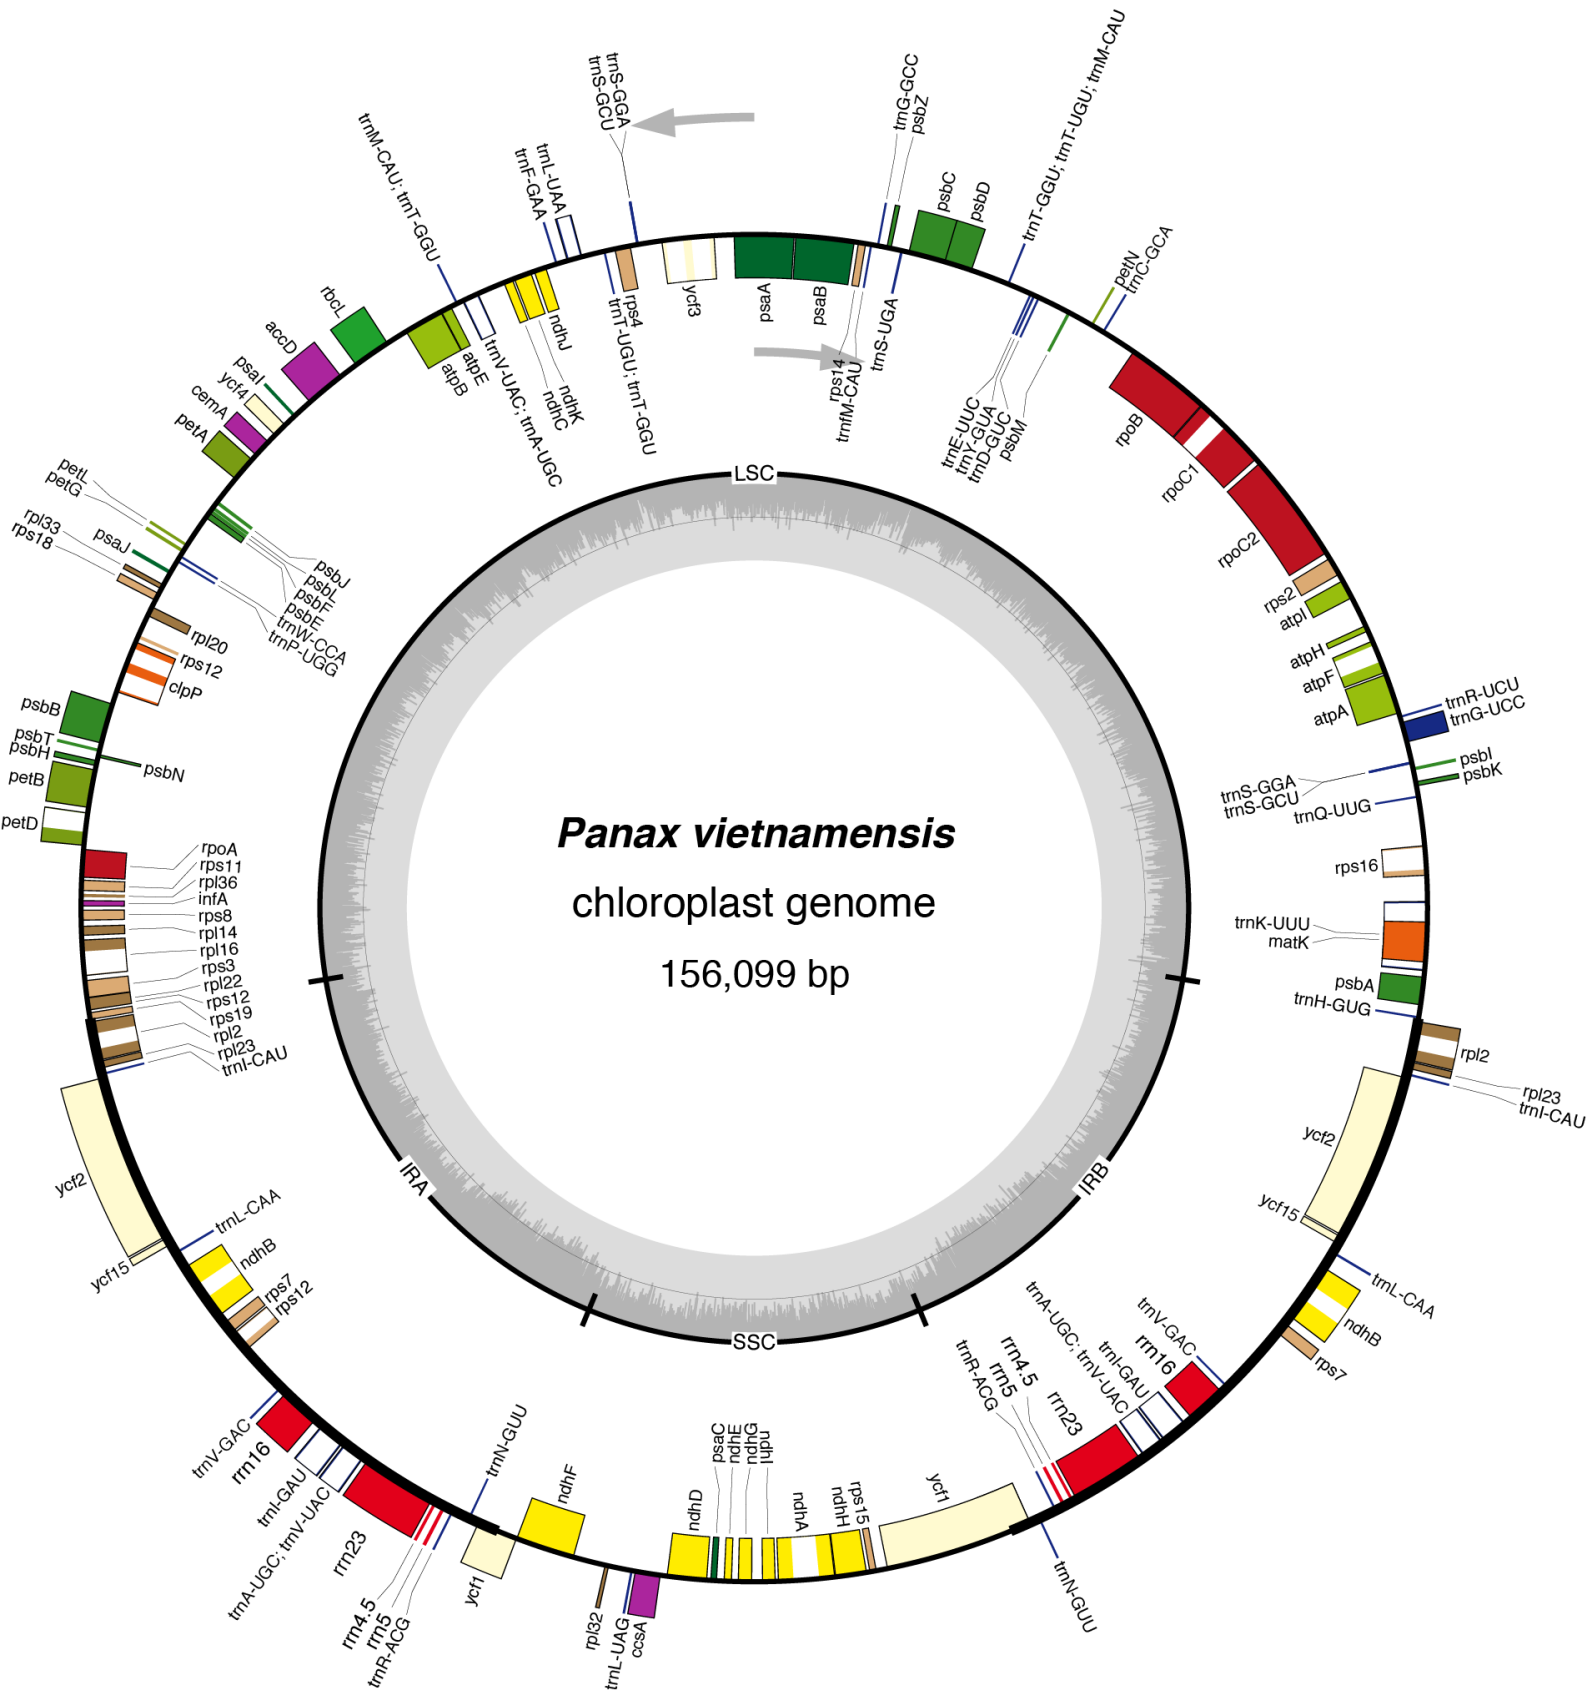

- |                                                                 |                                                                                        |
|-----------------------------------------------------------------|----------------------------------------------------------------------------------------|
| <span style="color: green;">■</span> photosystem I              | <span style="color: purple;">■</span> other genes                                      |
| <span style="color: darkgreen;">■</span> photosystem II         | <span style="color: red;">■</span> RNA polymerase                                      |
| <span style="color: olive;">■</span> cytochrome b/f complex     | <span style="color: darkred;">■</span> ribosomal RNAs                                  |
| <span style="color: yellow;">■</span> ATP synthase              | <span style="color: orange;">■</span> clpP, matK                                       |
| <span style="color: lightyellow;">■</span> NADH dehydrogenase   | <span style="color: tan;">■</span> ribosomal proteins (SSU)                            |
| <span style="color: lightgreen;">■</span> RubisCO large subunit | <span style="color: brown;">■</span> ribosomal proteins (LSU)                          |
| <span style="color: blue;">■</span> transfer RNAs               | <span style="color: lightgrey;">■</span> hypothetical chloroplast reading frames (ycf) |
