# Supplementary material for: Phylogenomics and barcoding of Panax: toward the identification of ginseng species
Source: PubMed Central journal article supplement (PMC5883351; doi:10.1186/s12862-018-1160-y), 2018-04-03
Supplement: 12862_2018_1160_MOESM9_ESM.pdf [file 12862_2018_1160_MOESM9_ESM.pdf]

*Panax stipuleanatus*  
chloroplast genome  
156,090 bp

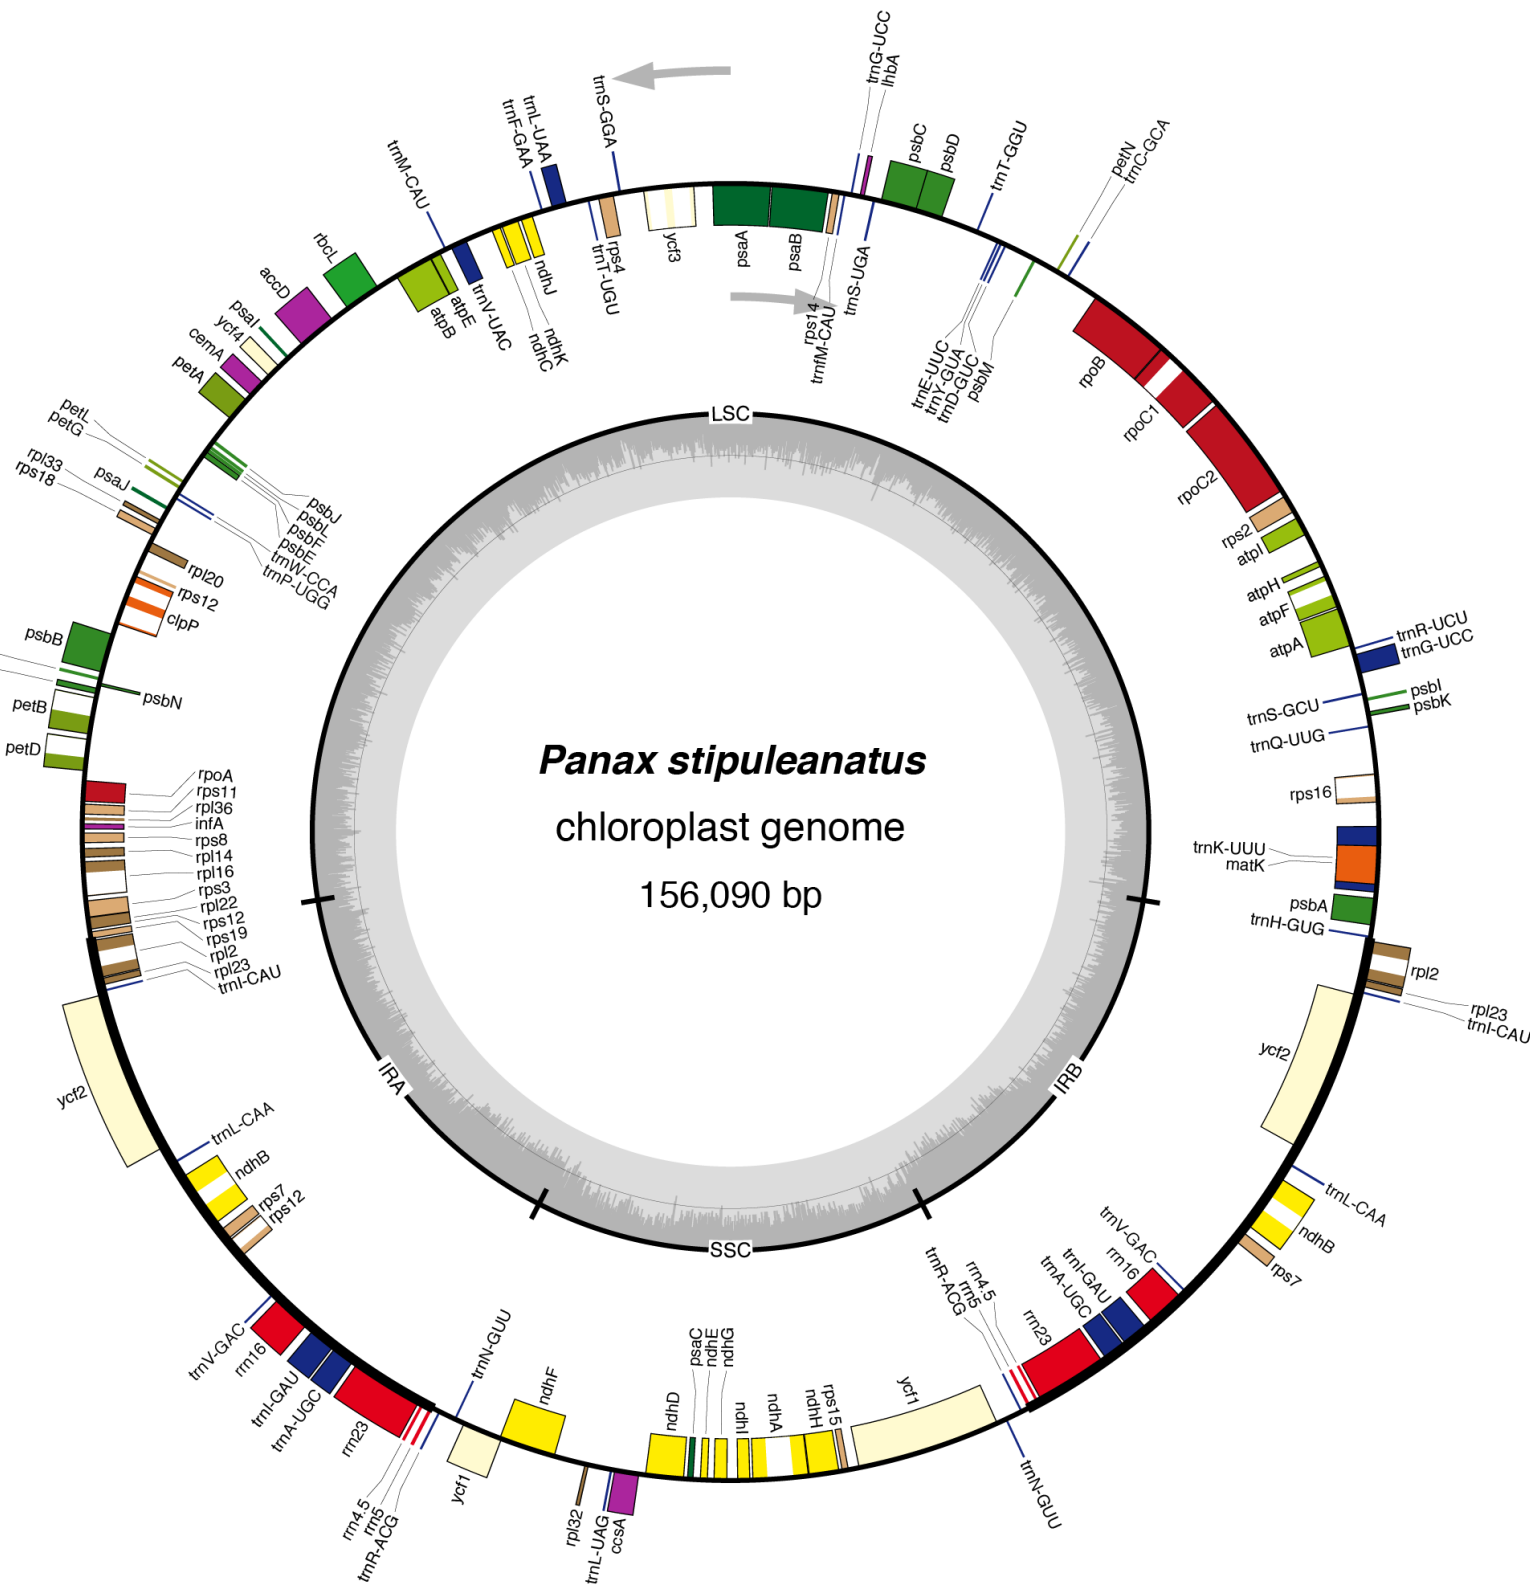

- photosystem I
- photosystem II
- cytochrome b/f complex
- ATP synthase
- NADH dehydrogenase
- RubisCO large subunit
- transfer RNAs
- other genes
- RNA polymerase
- ribosomal RNAs
- clpP, matK
- ribosomal proteins (SSU)
- ribosomal proteins (LSU)
- hypothetical chloroplast reading frames (ycf)
