# Supplementary material for: Phylogenomics and barcoding of Panax: toward the identification of ginseng species
Source: PubMed Central journal article supplement (PMC5883351; doi:10.1186/s12862-018-1160-y), 2018-04-03

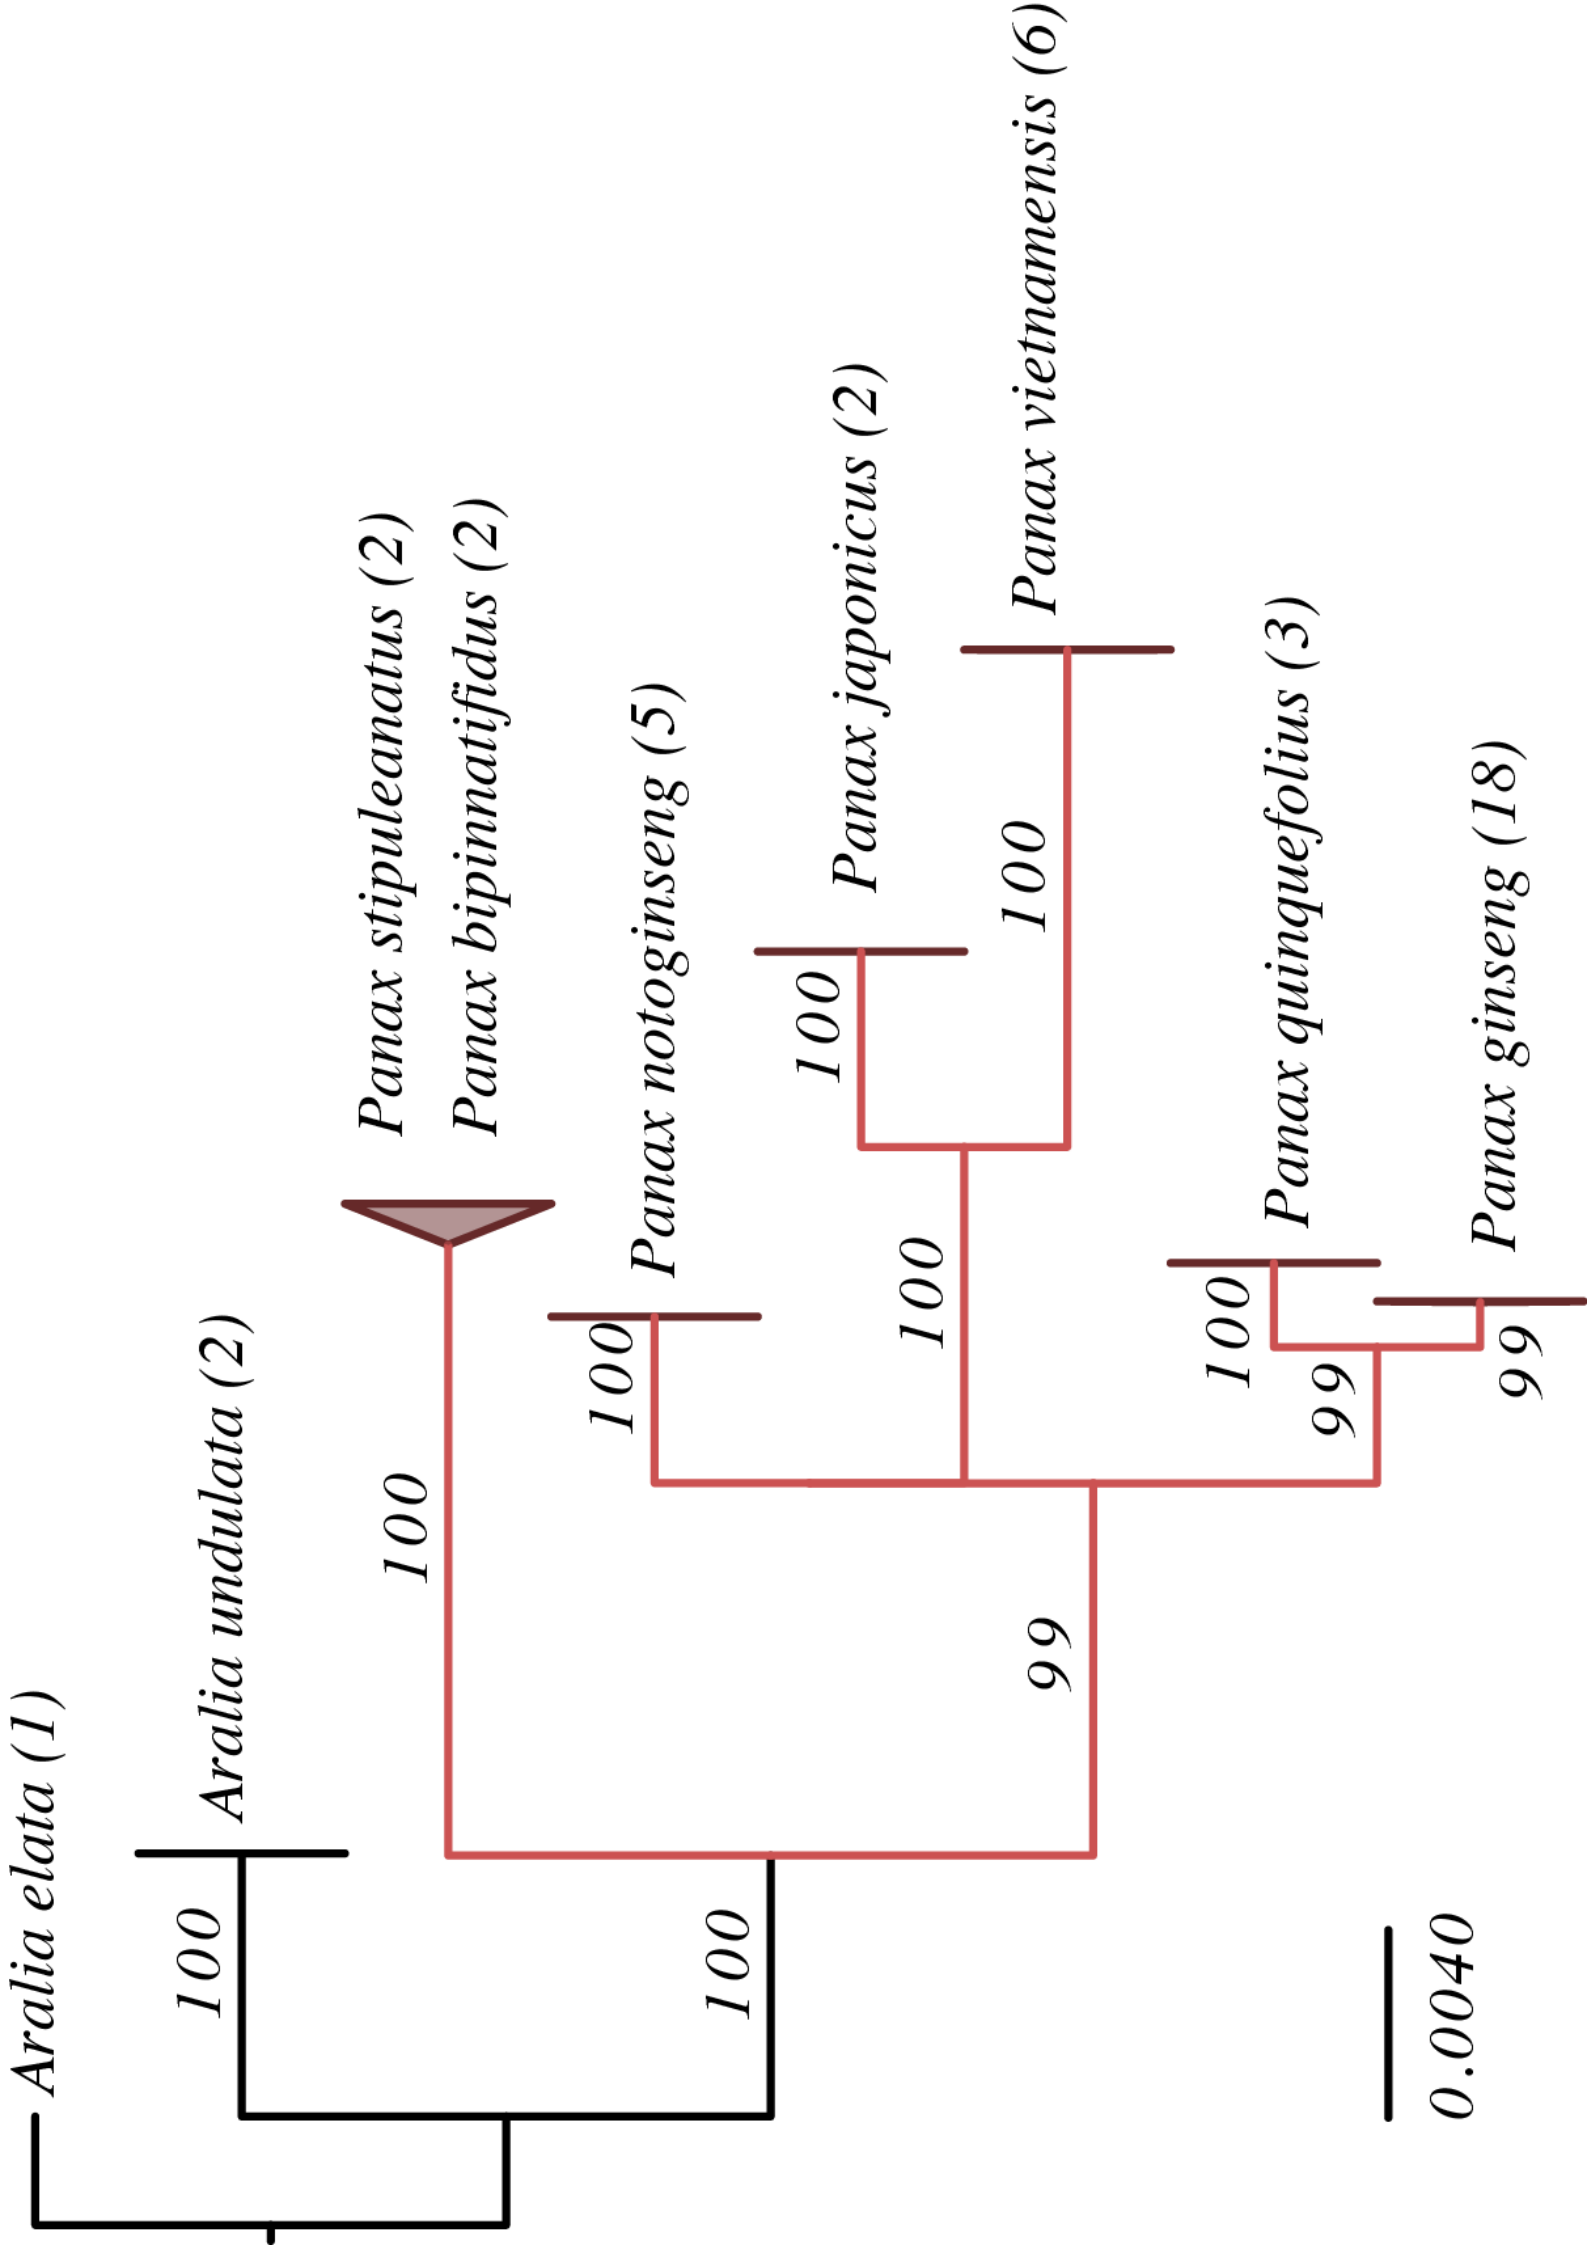

Supplement: 12862_2018_1160_MOESM13_ESM.pdf [file 12862_2018_1160_MOESM13_ESM.pdf]
