# Supplementary material for: Phylogenomics and barcoding of Panax: toward the identification of ginseng species
Source: BMC Evol Biol. 2018 Apr 3;18:44. doi: 10.1186/s12862-018-1160-y (PMC5883351; doi:10.1186/s12862-018-1160-y)

1 *P. sp* (*puxailaileng*)

10.6465 ng/uL

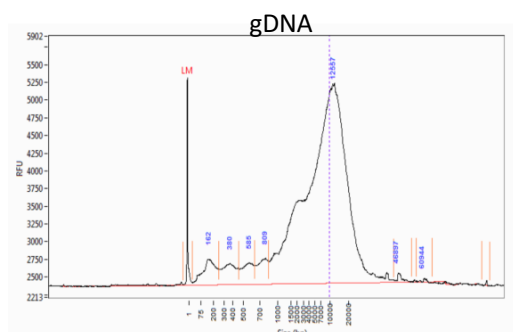

2 *P. bipinnatifidus*

4.7763 ng/uL

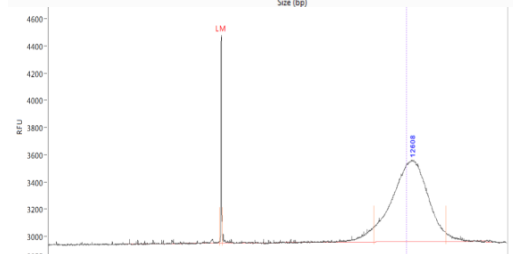

3 *P. stipuleanatus*

7.7039 ng/uL

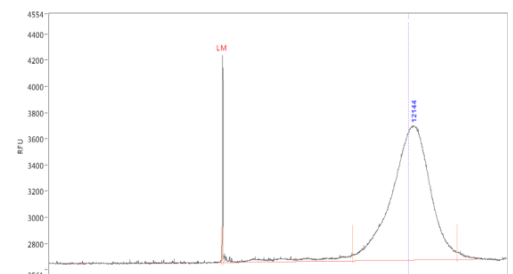

#### 4 *P. vietnamensis*

4.93 ng/uL

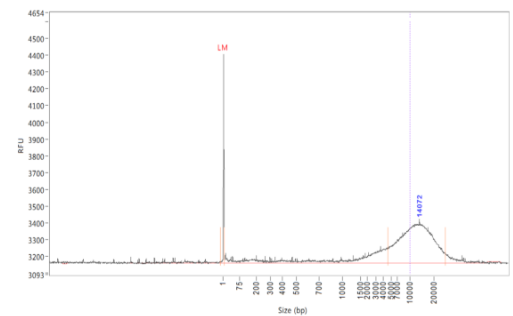

2.0033 ng/uL

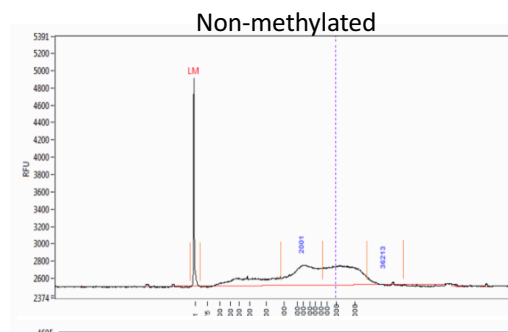

0.5657 ng/uL

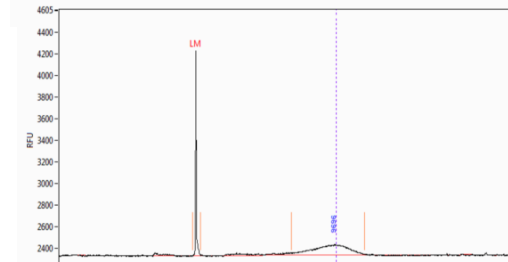

0.5132 ng/uL

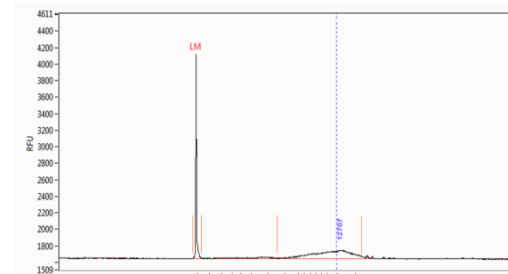

0.9733 ng/uL

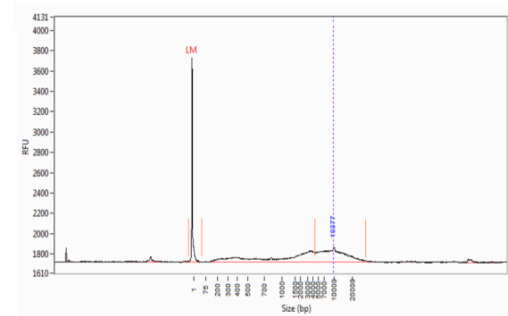

3.5500 ng/uL

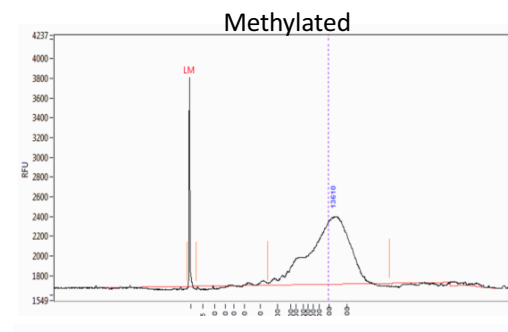

3.6451 ng/uL

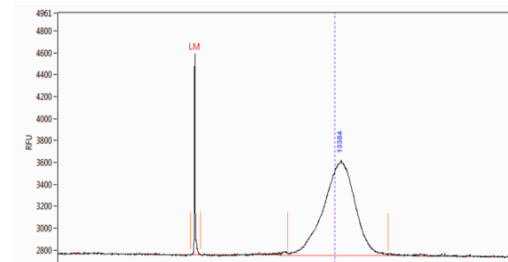

2.7907 ng/uL

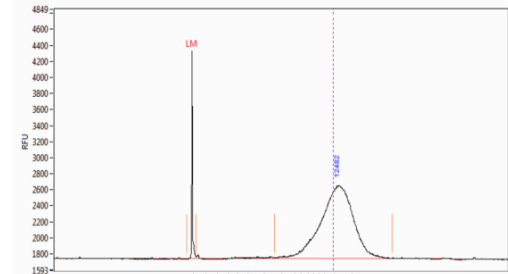

4.4691 ng/uL

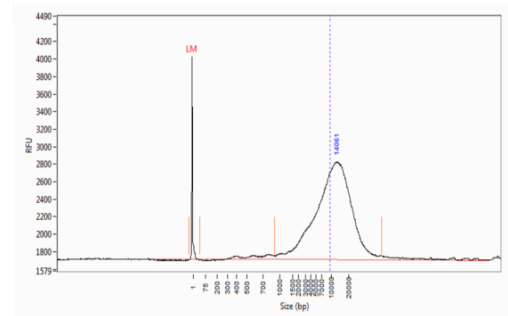

Supplement: Supplementary file 3 — Figure S1. Fragment analyzer DNA report of P. bipinnatifidus, P. sp. (puxailaileng), P. stipuleanatus, P. vietnamensis samples, for the genomic DNA (gDNA), for the non-methylated and methylated fractions. (PDF 410 kb) [file 12862_2018_1160_MOESM3_ESM.pdf]
